# Supplementary material for: EBV and MSI Status in Gastric Cancer: Does It Matter?
Source: MDPI journal article supplement (doi:10.3390/cancers15010074), 2022-12-22
Supplement: s1 [file s1]

# EBV and MSI Status in Gastric Cancer: Does It Matter?

Catarina Neto do Nascimento, Luís Mascarenhas-Lemos, João Ricardo Silva, Diogo Sousa Marques, Catarina Ferreira Gouveia, Ana Faria, Sónia Velho, Rita Garrido, Rui Maio, Andreia Costa, Patrícia Pontes, Xiaogang Wen, Irene Gullo, Marília Cravo, Fátima Carneiro

**Table S1.** Neoadjuvant chemotherapy regimens according to molecular classification.

| Regimen – n (%) | All tumors (n=50)* | MSS/EBV- (n=35)* | MSI-high (n=11) | EBV+ (n=4) |
|-----------------|--------------------|------------------|-----------------|------------|
| ECF-like        | 34 (66.7)          | 24 (68.6)        | 9 (81.9)        | 1 (25.0)   |
| FLOT            | 7 (13.7)           | 6 (17.1)         | 1 (9.1)         | 0 (0.0)    |
| FOLFOX          | 1 (2.0)            | 1 (2.9)          | 0 (0.0)         | 0 (0.0)    |
| DCF-like        | 8 (15.7)           | 4 (11.4)         | 1 (9.1)         | 3 (75.0)   |

ECF: epirubicin + cisplatin + fluorouracil; FLOT: fluorouracil + leucovorin + oxaliplatin + docetaxel; FOLFOX: leucovorin + oxaliplatin + fluorouracil; DCF: docetaxel + cisplatin + fluorouracil; \*in one patient with MSS tumor the type of ChT performed was not available in the medical records (n=50).

**Table S2.** Clinical characterization and pathological staging for all tumors according to treatment type (surgery alone *versus* neoadjuvant ChT).

| Variables                                         | Surgery alone    | Neoadjuvant ChT  | p-value <sup>a</sup> |
|---------------------------------------------------|------------------|------------------|----------------------|
| <b>Total – n (%)</b>                              | <b>86 (62.8)</b> | <b>51 (37.2)</b> |                      |
| <b>Sex</b>                                        |                  |                  |                      |
| Male                                              | 46 (53.5)        | 34 (66.7)        | 0.130                |
| Female                                            | 40 (46.5)        | 17 (33.3)        |                      |
| <b>Age at diagnosis (years)</b><br>median (range) | 70 (41-90)       | 64 (24-81)       | 0.001                |
| <b>Pathologic (y)T<sup>b</sup></b>                |                  |                  |                      |
| T1/2                                              | 32 (37.2)        | 15 (29.4)        | 0.353                |
| T3/4                                              | 54 (62.8)        | 36 (70.6)        |                      |
| <b>Pathologic (y)N</b>                            |                  |                  |                      |
| Negative                                          | 28 (32.6)        | 17 (33.3)        | 0.926                |
| Positive                                          | 58 (67.4)        | 34 (66.7)        |                      |
| <b>Resection status</b>                           |                  |                  |                      |
| R0                                                | 75 (87.2)        | 47 (92.2)        | 0.608                |
| R1                                                | 7 (8.1)          | 2 (3.9)          |                      |
| R2                                                | 4 (4.7)          | 2 (3.9)          |                      |
| <b>MSI/EBV status</b>                             |                  |                  |                      |
| MSS/EBV-                                          | 58 (67.4)        | 36 (70.6)        | 0.383                |
| MSI-high                                          | 54 (29.1)        | 11 (21.6)        |                      |
| EBV+                                              | 3 (3.5)          | 4 (7.8)          |                      |

EBV, Epstein-Barr virus; ChT, chemotherapy; MSI-high, high microsatellite instability; MSS, microsatellite stable; <sup>a</sup>p-value of Chi-square test or Fisher's exact test compared to MSS/EBV-. The Kruskal-Wallis H test was used to analyze the continuous variable "age". <sup>b</sup> Classification according to 8th edition AJCC system for GC. y denotes the T, N, and TNM stages after neoadjuvant chemotherapy.

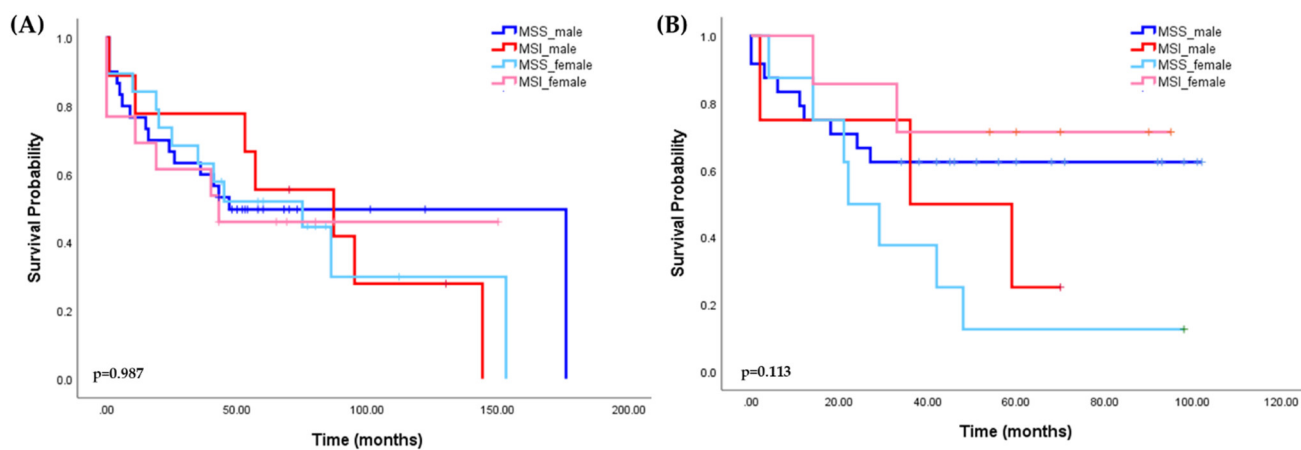

**Figure S1.** Overall survival by MSI status in females and males treated with direct surgery (A) or perioperative chemotherapy (B). MSI microsatellite instability; MSS, microsatellite stable.
